# Supplementary material
Source: publisher figshare collection journal article supplement (https://diabetesjournals.figshare.com/ndownloader/files/33617357)
Supplement: Supplementary file 1 [file 33617357]

## Sheet: Table S1
	Table S1. Cohort Descriptives
	COHORT	AGES	ARIC	BioMe	Doetinchem	FHS	GENOA	Health ABC	MGB	MESA	NEO	PROSPER	Rotterdam	UKBB
	Full Cohort Name	Age, Gene/Environment Susceptibility—Reyjavik Study	Atherosclerosis Risk in Communities Study	Institute for Personalized Medicine (IPM) BioMe Biobank	The Doetinchem Cohort Study	Framingham Heart Study	Genetic Epidemiology Network of Arteriopathy	The Health Aging and Body Composition Study	Mass General Brigham Biobank	Multi-Ethnic Study of Atherosclerosis	The Netherlands Epidemiology of Obesity Study	PROspective Study of Pravastatin in the Elderly at Risk	The Rotterdam Study	UK Biobank
	Cohort reference (PMID)	PMID: 17351290	PMID: 2646917	PMID: 31892343	PMID: 18238821	PMID: 14819398, PMID: 474565, PMID: 17372189.	PMID: 11799070; PMID: 15121494	PMID 11723084		12397006[PMID]	PMID: 23576214	10569329; PMID:12457784; PMID: 21977987	PMID: 29064009
Body Mass Index (BMI)	Unit	kg/m^2	kg/m^2	kg/m^2	kg/m^2	kg/m^2	kg/m^2	kg/m^2	kg/m^2	kg/m^2	kg/m^2	kg/m^2	kg/m^2	kg/m^2
	Definition	Calculated at AGES entry visit. log transformed	Calculate for those weight and height recorded at exam 1	Log transformed, Calculated for those only with weight recorded at the exam of interest But the last updated value of height (of all exams) was used in the calculation	log transformed	Log transformed, Calculated for those only with weight recorded at the exam of interest But the last updated value of height (of all exams) was used in the calculation	Calculated for those only with weight recorded at the exam of interest But the last updated value of height (of all exams) was used in the calculation	log transformed	Retrieved from the Partners Research Patient Data Registry (RPDR) datafiles PHY and PRM, 15041 records directly from PHY, 25 from PRM, while 4 of them are calculated based on Height and Weight in PHY.	Log transformed, Calculated using measurements of weight and height at exam1.	log transformed	log transformed	Log transformed, Calculated using measurements of weight and height at entry visits.	UKB f.21001. Calculated from height and weight at assessment center visit. Average of multiple visits. Log transformed. Winsorized at 5SD.
	Sample Size	3212	9336	7783	4078	7056	1390	1639	15070	2685	5705	5244	8695	376910
	Mean (SD)	3.287 (0.161)	3.280.98 (0.171)	3.25 (0.201)	3.187(0.133)	3.312(0.187)	3.397 (0.199)	3.271(0.153)	3.324(0.205)	3.31(0.18)	3.388 ( 0.157 )	3.28 (0.15)	3.298 (0.153)	3.296 (0.166)
High Density Lipoprotein (HDL)	Unit	mg/dL	mg/dL	mg/dL	mg/dl	mg/dL	mg/dL	mg/dL	mg/dL	mg/dL	mg/dL	mg/dL	mg/dL (values were converted from mmol/L to mg/dL	mg/dL
	Definition	n/a	Recalibrated HDL (corrected based on measurement year)	n/a		n/a	n/a	n/a	Retrieved from RPDR datafile LAB	n/a		directly measured	n/a	UKB f.30760. Measured by enzyme immunoinhibition analysis on a Beckman Coulter AU5800. Average of multiple visits. Convert mmol/L -> mg/dL by multiplying by 38.67. Winsorized at 5SD.
	Sample Size	3215	9327	5378	3167	6256	1389	1637	11104	2677	5688	5244	8693	331788
	Mean (SD)	61.187 (17.308)	50.53 (16.69)	58.2 (19.904)	55.53(16.13)	56.742(17.667)	51.42 (15.99)	51.98807(16.29162)	56.776(20.455)	52.45(15.78)	25.743(7.408)	49.47 (13.53)	25.862 (7.560)	56.282 (14.807)
Low Density Lipoprotein (LDL)	Unit	mg/dL	mg/dL	mg/dL	n/a	mg/dL	mg/dL	mg/dL	mg/dL	mg/dL	mg/dL	mg/dL	mg/dL	mg/dL
	Definition	if using statins then divided value by 0.7	Calculated according to the Friedewald equation	Directly measured	n/a	Calculated using Friedewald formula if triglycerides are <=400 (otherwise set to missing): All values in mg/dL. LDL = (total cholesterol) – (high-density lipoprotein cholesterol [HDL-C]) – (triglycerides/5). If they were on a statin prescription, then their LDL was adjusted by dividing by 0.7.	Calculated using Friedewald formula if triglycerides are <=400 ; if using lipid-lowering, the TC value was adjusted by dividing by 0.7	If using statins, then LDL was adjusted by dividing by 0.7	Retrieved from RPDR datafile LAB	Calculated using Friedewald formula if triglycerides are <=400 (otherwise set to missing): All values in mg/dL. LDL = (total cholesterol) – (high-density lipoprotein cholesterol [HDL-C]) – (triglycerides/5). If they were on a statin prescription, then their LDL was adjusted by dividing by 0.7.	fasting ldl cholestrol calculated with Friedewald formula ; if using lipid-lowering, the TC value was adjusted by dividing by 0.7	directly measured	Calculated using Friedewald formula: All values in mg/dL. LDL = (total cholesterol) – (high-density lipoprotein cholesterol [HDL-C]) – (triglycerides/5). If they were on a statin prescription, then their LDL was adjusted by dividing by 0.7.	UKB f.30780. Measured by enzymatic protective selection analysis on a Beckman Coulter AU5800. Average of multiple visits. Convert mmol/L -> mg/dL by multiplying by 38.67. Those on statins (f.6177 or f.6153 ever included "Cholesterol lowering medication") -> divide by 0.70. Winsorized at 5SD.
	Sample Size	3213	9127	5381	n/a	6187	1389	1604	10948		5687	5244	8623	360807
	Mean (SD)	145.086 (36.996)	137.92 (38.63)	114 (44.353)	n/a	119.770(35.926)	128.53 (38.97)	126.998(37.061)	113.820(43.191)	111.26(34.33)	67.457(17.329)	146.46 (30.73)	73.862 (18.579)	146.556 (34.155)
Total Cholesterol	Unit	mg/dL	mg/dL	mg/dL	mg/dl	mg/dL	mg/dL	mg/dL	mg/dL	mg/dL	mg/dL	mg/dL	mg/dL	mg/dL
	Definition	if using statins then divided value by 0.8	Total cholesterol	Directly measured	if using statins divided by 0.8	Adjusted for lipid lowering medication- if using statin prescription, the TC value was adjusted by dividing by 0.8	Adjusted for lipid lowering medication- if using lipid-lowering, the TC value was adjusted by dividing by 0.8	If using statins, then cholosterol was adjusted by dividing by 0.8	Retrieved from RPDR datafile LAB	Adjusted for lipid lowering medication- if using statin prescription, the TC value was adjusted by dividing by 0.8	if using lipid-lowering, the TC value was adjusted by dividing by 0.8	directly measured	Adjusted for lipid lowering medication- if using statin prescription, the TC value was adjusted by dividing by 0.8	UKB f.30690. Measured by CHO-POD analysis on a Beckman Coulter AU5800. Average of multiple visits. Convert mmol/L -> mg/dL by multiplying by 39.67. Those on statins (f.6177 or f.6153 ever included "Cholesterol lowering medication") -> divide by 0.80. Winsorized at 5SD.
	Sample Size	3215	9325	5417	3167	6266	1391	1638	11358	2676	5689	5244	8738	361458
	Mean (SD)	228.046 (41.184)	214.88 (40.83)	196 (50.757)	211.64(40.41)	201.606 (38.733)	219 (42.51)	209.189(41.168)	197.553(48.380)	188.86(39.96)	105.304(18.784)	219.87 (34.93)	104.054 (19.093)	229.267 (43.000)
Triglycerides	Unit	mg/dL	mg/dL	mg/dL	n/a	mg/dL	mg/dL	mg/dL	mg/dL	mg/dL	mg/dL	mg/dL	mg/dL	mg/dL
	Definition	log transformed	Total triglycerides (Log transformed)	Log transformed	n/a	Log transformed	Log transformed	log transformed	Retrieved from RPDR datafile LAB	Log transformed	Log transformed	Log transformed	Log transformed	UKB f.30870. Measured by GPO-POD analysis on a Beckman Coulter AU5800. Average of multiple visits. Convert mmol/L -> mg/dL by multiplying by 88.57. Log transform. Winsorized at 5SD.
	Sample Size	3215	9327	5410	n/a	6267	1391	1638	11414	2679	5688	5244	8703	361159
	Mean (SD)	4.562 (0.451)	4.776 (0.517)	4.63 (0.553)		4.673(0.537)	5.14 (0.46)	4.904(0.481)	4.689(0.551)	4.73(0.53)	3.119(0.542)	4.83 (0.42)	3.192 (0.438)	4.906 (0.514)
Coronary Artery Disease	Definition	MI event before entry to AGES according to hospital records, IHA registry or ECG, or after entry to AGES according to hospital records (follow-up throughout 2015). Note, would also be possible to include other coronary events but this variable was most similar to the one used by FHS	If patient had any of the following : MI from adjudicated Visit 1 ECG data, History of Myocardial Infarction,: Heart or arterial surgery, Coronary Bypass, Balloon angioplasty, Angioplasty of Coronary Artery (ies)	Definition based on a validated CAD algorithm which needed cardiac catheterization evidence for diagnosis of CAD. Controls selected from individuals without CAD ICD codes or selected as controls by the CAD algorithm	MI: self reported myocardial infarction	MI recognized, with diagnostic ECG; MI recognized, without diagnostic ECG, with enzymes and history; MI recognized, without diagnostic ECG, with autopsy evidence, new 85 event (see also code 9);MI unrecognized, silent; MI unrecognized, not silent	Self-reported MI or coronary revascularization	History of myocardial infarction	Retrieved from Partners Biobank curated disease population for CAD. Cases, current or past history (PPV 0.97); controls, CAD - no history (NPV 0.99)	all-cause coronary heart disease (CHDA), including MI, Resuscitated cardiac arrest, definite angina, probable angina, and CHD death;	history of myocardial infarction	History of Myocardial infarction.	Coronary heart disease (CHD) defined as a compound outcome including fatal or nonfatal myocardial infarction or CHD mortality	UKB f.42000. Myocardial infarction outcomes (algorithmically defined). Date of MI. If this field was nonmissing -> 1, else 0.
	Sample Size	3184	9148	8244	3167	6913	1391	1639	13234	2518	5703	5244	8801	377253
	Cases	782	467	1690	100	273	108	227	2059	254	127	708	1003	13286
	Controls	2402	8681	6554	3067	6640	1283	1412	11175	2264	5576	4536	7798	363967
estimated Glomerular Fitration Rate (eGFR)	Unit	mL/min/1.73 m^2	ml/min/1/73 m2	mL/min/1.73 m^2	mL/min/1.73 m^2	mL/min/1.73 m^2	mL/min/1.73 m^2	mL/min/1.73 m^2	mL/min/1.73 m^2	mL/min/1.73 m^2	mL/min/1.73 m^2	mL/min/1.73 m^2	mL/min/1.73 m^2	mL/min/1.73 m^2
	Definition	eGFR equations from : Inker L. et al Estimating Glomerular Filtration Rate from Serum Creatinine and Cystatin C NEJM 2012 EGFR= (sex=2 and cre_s le 0.7)*144*(cre_s/0.7)**(-0.329)*0.993**age + (sex=2 and cre_s > 0.7)*144*(cre_s/0.7)**(-1.209)*0.993**age + (sex=1 and cre_s le 0.9)*141*(cre_s/0.9)**(-0.411)*0.993**age + (sex=1 and cre_s > 0.9)*141*(cre_s/0.9)**(-1.209)*0.993**age	Serum creatinine was measured using a modified kinetic Jaffe method (1), and this was subsequently used to calculate creatinine-based eGFR (2).	eGFR = 141*min(creat/k or 1)^a * max(creat/k or 1)^-1.209 * 0.993^age * 1.018[if female] * 1.159[if black], #where a= -0.329[if female] or -0.411 [if male], #where k = 0.70[if female] or 0.90 [if male] #Note:Self reported race of African AMerican was considered as black and all other races considered as non-black	eGRFequations: female+creatine <= 0.7 : GFR = 144 × (Scr/0.7)-0.329 × (0.993)Age female+creatine > 0.7 : GFR = 144 × (Scr/0.7)-1.209 × (0.993)Age male+creatine <= 0.9 : GFR = 141 × (Scr/0.9)-0.411 × (0.993)Age male+creatine >0.9 : GFR = 141 × (Scr/0.9)-1.209 × (0.993)Age	eGFR = 141*min(creat/k or 1)^a * max(creat/k or 1)^-1.209 * 0.993^age * 1.018[if female] * 1.159[if black], #where a= -0.329[if female] or -0.411 [if male], #where k = 0.70[if female] or 0.90 [if male] #Note: we excluded ethnic outliers so our sample is white	Glomerular Filtration Rate MDRD Quadratic Equation	equations: female+creatine <= 0.7 : GFR = 144 × (Scr/0.7)-0.329 × (0.993)Age female+creatine > 0.7 : GFR = 144 × (Scr/0.7)-1.209 × (0.993)Age male+creatine <= 0.9 : GFR = 141 × (Scr/0.9)-0.411 × (0.993)Age male+creatine >0.9 : GFR = 141 × (Scr/0.9)-1.209 × (0.993)Age	Retrieved from RPDR datafile LAB, if direct eGFR is not available, calculating eGFR from serum creatine using formula."GFR = 141 × min(Scr/κ, 1)^α × max(Scr/κ, 1)^(-1.209) × 0.993^Age × 1.018 [if female] × 1.159 [if black]"	EGFR USING CKD-EPI EQUATION	estimated glomerular filtration rate (CKD-EPI)	estimated glomerular filtration rate MDRD	estimated glomerular filtration rate (CKD-EPI)	UKB f.30700. Serum Creatinine. Remove ESRD using fields 42027 and 42026. Convert micromol/L -> mg/dL by dividing by 88.42. CKD-epi formula in "nephro" R package -> eGFR. Then averaged multiple eGFRs. Winsorized.
	Sample Size	3215	9338	7510	3137	6255	1391	1639	16621	2678	5689	5237	8512	361262
	Mean (SD)	63.818 (15.416)	(99.56) 12.52	77.8 (23.114)	95.26(10.396)	88.830(15.551)	79.64 (16.51)	66.669(13.355)	77.972(22.746)	75.77(16.97)	86.095(12.531)	72.04 (21.44)	78.795 (16.107)	90.493 (13.181)
Chronic Kidney Disease (CKD)	Definition	eGFR<60	Defined as eGFR<60	CKD was defined by a validated phenotyping algorithm (PMID: 25954398)	n/a	Defined as eGFR<60	Defined as eGFR<60	Defined as eGFR<60	eGFR<60 set to 1, eGFR>= 60 set to 0	Defined as eGFR<60	Defined as eGFR<60	eGFR<60 set to 1, eGFR>= 60 set to 0, missing -> set to NA.	Defined as eGFR<60	eGFR<60 set to 1, eGFR>= 60 set to 0, missing -> set to NA.
	Sample Size	3215	9338	8668	n/a	6255	1391	1639	16621	2685	5705	5236	8512	360468
	Cases	1274	89	541	n/a	275	165	492	3370	344	141	1549	1060	7722
	Controls	1941	9249	8127	n/a	5980	1226	1147	13251	2341	5564	3687	7452	352746
Systolic Blood Pressure (SBP)	Unit	mmHg	mmHG	mmHg	mmHg	mmHg	mmHg	mmHg	mmHg	mmHg	mmHg	mmHg	mmHg	mmHg
	Definition	Average systolic blood pressure (mmHg) at visit 1. If on any hypertension mediciation then add 15.	Measured using a standardized Hawksley random-zero mercury column sphygmomanometer with participants in a sitting position after a resting period of 5 minutes. The size of the cuff was chosen according to the arm circumference. Three sequential recordings for systolic and diastolic blood pressure were obtained; the mean of the last two measurements was used in this analysis, discarding the first …	If on blood pressure meds, add 15	systolic blood pressure. if on any hypertension meds, 15 added	If on blood pressure meds, add 15	Measured using a standardized Hawksley random-zero mercury column sphygmomanometer with participants in a sitting position after a resting period of 5 minutes. The size of the cuff was chosen according to the arm circumference. Three sequential recordings for systolic and diastolic blood pressure were obtained; the mean of the last two measurements was used in this analysis, discarding the first …	Average systolic blood pressure at visit 1. If taking hypertenstion meds, 15 added	Retrieved from RPDR datafile PHY	If on blood pressure meds, add 15	adjusted SBP (added 15 ) if individuals are on blood pressure medication	systolic blood pressure. if on any hypertension meds, 15 added	If on blood pressure meds, add 15	average of 2 automated readings per visit (f.4080.0.0/f.4080.0.1). If missing, then average of 2 manual readings per visit (f.93.0.0/f.93.0.1). Then average for multiple visits.Those on blood pressure medication (f.6177 or f.6153 ever included "Blood pressure medication") -> add 15. Winsorized at 5SD.
	Sample Size	3214	9340	3869	3170	7078	1390	1639	15362	2682	5697	5244	8662	377759
	Mean (SD)	152.110 (22.223)	122.21(19.49)	154 (20.893)	136.32(20.592)	127.764(21.864)	142.56 (19.85)	141.114(22.415)	135.435(19.553)	128.24(23.19)	137.58(19.39)	165.68 (23.27)	144.088 (22.054)	141.190 (20.775)
Diastolic Blood Pressure (DBP)	Unit	mmHg	mmHG	mmHg	mmHG	mmHg	mmHg	mmHg	mmHg	mmHg	mmHg	mmHG	mmHg	mmHg
	Definition	Average diastolic blood pressure (mmHg) at visit . If on any hypertension mediciation then add 10.	see above. If on blood pressure meds, add 10	If on blood pressure meds, add 10	diastolic blood pressure. if on any hypertension meds, 10 added	If on blood pressure meds, add 10	Measured using a standardized Hawksley random-zero mercury column sphygmomanometer with participants in a sitting position after a resting period of 5 minutes. The size of the cuff was chosen according to the arm circumference. Three sequential recordings for systolic and diastolic blood pressure were obtained; the mean of the last two measurements was used in this analysis, discarding the first …	Average diastolic blood pressure at visit 1. If taking hypertenstion meds, 10 added	Retrieved from RPDR datafile PHY	If on blood pressure meds, add 10	diastolic blood pressure. if on any hypertension meds, 10 added	diastolic blood pressure. if on any hypertension meds, 10 added	If on blood pressure meds, add 10	average of 2 automated readings per visit (f.4079.0.0/f.4079.0.1). If missing, then average of 2 manual readings per visit (f.94.0.0/f.94.0.1). Then average for multiple visits. Those on blood pressure medication (f.6177 or f.6153 ever included "Blood pressure medication") -> add 10. Winsorized at 5SD.
	Sample Size	3214	9340	3884	3170	7078	1390	1639	15362	2682	5696	5244	8662	377761
	Mean (SD)	80.432 (10.553)	74.13 (11.52)	91 (11.893)	83.61(18.549)	76.714(10.917)	84.66 (10.72)	74.937(12.183)	80.497(11.820)	75.06(12.54)	88.233(11.682)	91.08 (12.48)	80.756 (11.948)	84.340 (11.342)
Hypertension (HTN)	Definition	Being on blood pressure medication, and/or having SBP >140 and/or DBP >90	If SBP >140 or DBP>90 or on BP lowering medications= Yes	HTN was defined by a validated phenotyping algorithm (PMID: 25954398)	Being on blood pressure medication, and/or having SBP >140 and/or DBP >90	Being on blood pressure medication, and/or having SBP >140 and/or DBP>90	Being on blood pressure medication, and/or having SBP >140 and/or DBP>90	Being on blood pressure medication, and/or having SBP >140 and/or DBP >90	Using fields above - If on blood pressure medication OR SBP > 140 OR DBP > 90, set to 1.	Being on blood pressure medication OR having SBP >140 OR DBP>90	Being on blood pressure medication, and/or having SBP >140 and/or DBP >90	Being on blood pressure medication, and/or having SBP >140 and/or DBP >90	Being on blood pressure medication OR having SBP >140 OR DBP>90	Using fields above - If on blood pressure medication OR SBP > 140 OR DBP > 90, set to 1. Then of the remainder, if nonmissing, set to 0. Then if missing set to NA.
	Sample Size	3215	9300	8668	3170	7078	1391	1639	15364	2685	5705	5244	8776	376993
	Cases	2553	2498	2808	1526	2596	1303	1026	9926	1165	3193	3257	6482	198189
	Controls	662	6802	5860	1644	4482	361	613	5438	1520	2512	1987	2294	178804
Insulin Use	Definition	Taking insulin medication at time of exam	Self-reported on insulin medication	Taking insulin medication during any point within the EHR history	insulin injections for diabetes	Taking insulin medication at time of exam	Taking insulin medication at time of exam	Taking insulin medication at time of exam	Retreived from RPDR datafile MED. Among all outpatient medication records, if the records are related to insulin term ("insulin", "levemir", "detemir", "lantus", "glargine", "lispro", "humalog", "aspart", "novolog", "nph", "humulin"), the insulin use is set to be 1. Records with insulin syringe or needle are not considered as positive insulin use records. Also, people with only one instance of in…	Taking insulin medication at baseline or during follow-up of the RS	Self-reported on insulin medication	insulin injections for diabetes	Taking insulin medication at baseline or during follow-up of the RS	Those on insulin (f.6177 or f.6153 ever included "insulin") self reported ever OR nurse interview medication code "insulin" (f.20003)
	Sample Size	369	812	8668	221	852	151	231	3469	2682	576	544	8809	378141
	Cases	21	96	635	33	87	38	132	1299	24	13	46	127	4006
	Controls	348	716	8033	188	765	113	99	2170	2658	5692	498	8682	374135
Age at Type 2 Diabetes Diagnosis	Unit	years	N/A	years	years	years	years	years	NA	years	years	NA	NA	years
	Definition	Only defined for those with T2D, otherwise missing	N/A	Only defined for those with T2D, otherwise missing	Only defined for those with T2D, otherwise missing	Only defined for those with T2D, otherwise missing	Only defined for those with T2D, otherwise missing	Only defined for those with T2D, otherwise missing	NA	Only defined for those with T2D, otherwise missing	Only defined for those with T2D, otherwise missing	NA	NA	Only defined for those with T2D and age of diagnosis>36. Average over mutiple visits. Set age discrepancies between multiple reportings > 10 years to NA.
	Sample Size	368	N/A	747	203	852	151	231	NA	117	354	NA	NA	14246
	Mean (SD)	68.117 (11.463)	N/A	62.5 (11.784)	55.3(12.7)	57.802(10.508)	53.54 (12.04)	60.572(10.973)	NA	55.62(13.96)	51.893(8.167)	NA	NA	55.27 (7.47)
Age	Sample Size	3219	9344	8668	4080	7145	1391	1639	18127	2682	5705	5244	8809	378141
	Mean (SD)	76.41 (5.46)	54.3 (5.7)	62.5(11.8)	60.2 (9.3)	56.47 (13.60)	55.47 (10.85)	73.78(2.84)	62.75(13.24)	62.74(10.15)	56.9 (5.9)	75.34 (3.35)	65.5 (9.9)	57.4 (8.04)
Sex	Sample Size	3219	9344	8668	4080	7145	1391	1639	18127	2685	5705	5244	8809	378141
	Males	1352	4406	4042	1909	3251	612	868	8659	1285	2735	2524	3821	174131
	Females	1867	4938	4626	2171	3894	779	771	9468	1400	2968	2720	4988	204010
Type 2 Diabetes	Definition	self-reported diabetes, diabetes medication use or fasting plasma glucose ≥ 7 mmol/L, after excluding individuals with established type 1 diabetes	Self-report of diagnosis of diabetes by a physicians, use of diabetes medication, fasting glucose ≥7 mmol/L,or non-fasting glucose >11.1 mmol/L	Case control definition algorithm: https://phekb.org/phenotype/type-2-diabetes-mellitus	self-report or level of random glucose (>11.1 mmol/l ).	use of diabetes medication, fasting glucose ≥7 mmol/L, 2 hour glucose ≥11.1 mmol/L, or HbA1c ≥6.5%	Diabetes medication use or fasting plasma glucose ≥ 7 mmol/L	Self-reported diabetes, diabetes medication, fasting glucose over 126 mg/dl, diabetes type 1 excluded	Curated Disease Category in Partners Biobank Portal (Biobank prevalence = 10.6%; Algorithm AUC=0.977) supplemented with at least one HbA1c measurement in the electronic medical record (EMR) greater than or equal to 6.5%. Controls had no evidence of T2D (PPV=0.99) and no HbA1c values greater than or equal to 5.7%. These phenotypes were developed by the Biobank Portal team using both structured and…	self-reported diabetes, diabetes medication use or fasting plasma glucose ≥ 7 mmol/L	self-reported DM I or II or medication' or 'fasting plasma glucose >=7.0 mmol/L'	self-reported diabetes, diabetes medication use or fasting plasma glucose ≥ 7 mmol/L	defined as a fasting serum glucose level of ≥7.0 mmol/L or a non-fasting serum glucose level of ≥11.1 mmol/L (in case fasting serum samples were not available), or the use of blood glucose-lowering medications	Cases: Self-reported diabetes. Any self-reported nurse interview "any" or "t2d" diabetes. Any self-reported touch-screen "have you ever been diagnosed with diabetes by a doctor" field 2443. Removed individuals with self-reported nurse interview "t1d" "gdm" "di". Removed individuals with self-reported touch-screen gdm. Removed cases with max hba1c < 5.7. Controls: Remove any self-reported nurse in…
	Sample Size	3219	9327	8668	4080	7145	1391	1639	18127	2679	5705	5244	8760	321860
	Cases	369	812	922	147	852	151	231	3546	173	576	544	1050	15642
	Controls	2850	8515	7746	3933	6293	1240	1408	14581	2506	5129	4700	7710	306218
Age (T2D Cases)	Sample Size	369	812	922	147	852	151	231	3546	173	576	544	1050	15642
	Mean (SD)	76.27	56.1 (5.6)	62.5(11.8)	66.7 (8.7)	63.73 (10.82)	59.87 (9.37)	73.83(2.82)	68.62(11.53)	65.29（9.69）	58 (5.31)	75.21 (3.21)	68.3 (9.7)	55.29 (7.46)
Sex (T2D Cases)	Sample Size	369	812	922	147	852	151	231	3546	173	576	544	1050	15642
	Males	204	433	596	74	459	73	164	2141	104	324	305	554	10051
	Females	165	379	326	73	393	78	67	1405	69	251	239	496	5591
Genotyping	Genotyping platform & SNP Panel	Illumina 370CNV	Affymetrix 6.0	Illumina GSA	Illumina Infinium Global Screening Array-24 Kit (Illumina Inc., San Diego, California, United States of America)	Affymetrix 500K and MIPS 50K	Affymetrix 6.0, Illumina 1M-Duo	Human1M-Duov3_B	Illumina Multi-Ethnic GWAS/Exome SNP Array, Illumina Expanded Multi-Ethnic Genotyping Array (MEGA Ex), MEG (Multi-Ethnic Global) BeadChip	Affymetrix 6.0	Illumina HumanCoreExome-24 BeadChip (Illumina, San Diego, CA)	Illumina 660K beadchip	Illumina 550 K and 610 K	UK Biobank Axiom Array (50K total individuals in UKB were genotyped on the similar UK BiLEVE array).
	Genotyping Center	NIA Genetic Laboratory		Regeneron	Erasmus MC	Affymetrix	Genotyping Shared Resource, Advanced Genomic Technology Center, Mayo Clinic College of Medicine		Partners Biobank	Cedars-Sinai	Centre National de Génotypage (Evry Cedex, France)	Erasmus MC	Human Genotyping Facility of the Genetic Laboratory of the Department of Internal Medicine, Erasmus MC, Rotterdam, The Netherlands	Affymetrix Research Services Laboratory in Santa Clara, California, USA
	Genotyping Call Alogorithm	Illumina Bead Studio	Birdseed calling algorithm	Illumina Bead Studio	Infinium BeadChip	BRLMM	Birdseed and Genome Studio	Illumina Bead Studio	GenomeStudio	Birdseed v1.33	Illumina HumanCoreExome-24v1	Illumina Beadstudio	Beadstudio-Gencall	Affymetrix Power Tools software and the Affymetrix Best Practices Workflow
Sample QC	Call rate [filter detail / N excluded]	<95%	Call rate < 0.95: 16(EA), 36(AA)	<95% / 684	<95%	97% / 767	<95%	<95%	<99%(default as described in dbGaP)	<95%	>=98%	<98%	Sample call rate <98%	95% All genotyping QC was done interally at UKB following this document: https://www.biorxiv.org/content/10.1101/166298v1.full.pdf
	Heterozygosity [filter detail / N excluded]			ethnicity-specific heterozygosity rate +/- 6sd	FDR <1%	5 SD from mean (< 25.758% or > 29.958%) / 24	NA	PLINK --het from LD pruned data, used F cut-off of >= -0.15 and <= 0.15 for inclusion	NA		Het<mean±3s.d.		gender mismatch, excess autosomal heterozygosity, outlying identity-by-state clustering estimates	For example, we adjusted heterozygosity for population structure by fitting a linear regression model with the first six principal components (PCs) in a PCA as predictors (Figure A). Using this adjustment we identified 968 samples with unusually high heterozygosity or >5% missing rate
	Other exclusions	sample failure, genotype mismatch with reference panel and sex mismatch on genotypes	First degree relatives, ancestry outliers, sex discrepancies	EHR concordance - genetic sex	sex mismatch, duplicates and one individual out of each monozygotic twin pairs,participants widely diverged based on the first two principal components.	Excess mendelian errors / 2	Identical twins and sex mismatch; >= 6 SDs on first 10 PCs	sex mismatch, population outliers using PCA, no relatednesss closer than cousin (pihat threshold 0.125)	NA		Exclusion of genetic ancestry outliers +/-3.5SD; Exclusion of first/second degree relatives pi^>0.25	sample failure, heterozygosity and sex mismatch	na
	Individuals for Analysis	3219	9345(EA), 2874(AA)	31705	4080	8481	1464	1643	30716	2685	5705	5244	11502	488377
SNP QC	MAF [filter detail / N excluded]	MAF <1%		<1%	monomorphic markers (MAF<1/2N)	1% / 68,750	MAF < 1%	NA	NA	NA	MAF<1%	NA	MAF < 0.01
	HWE [filter detail / N excluded]	HWE p<1e-6	HWE <= 1e-6: 10,158(EA), 6,776(AA)	<1e-5 for European American	FDR<0.2	10-6 / 20,829	NA	NA	NA	HWE p<1e-6	>=1e-6	HWE p<1e-6	p_HWE < 1x10-6
	Call rate [filter detail / N excluded]	call rate < 97%	Call rate < 0.95: 234(combined EA,AA)	<95%	<95%	97% / 63,124	<95%	<95%	<0.95	<95%	>=98%	<97.5%	SNP call rate < 98%	0.951
	Other	Mishap p < 1e-9, A/T and G/C SNPs, Mismatches between Illumina, dbSNP and/or HapMap position			X-linked markers were likely to be autosomal	Not mapped or Excess Mendelian errors / 1047			Hundreds of poorly performing SNPs were manually clustered during their QC process. Furthermore, only the genotypes for SNPs properly mapped to the genome are included and the position and alleles reported correspond to the forward strand of the SNP marker in hg19 coordinates. Only samples and genotype calls that pass these quality control (QC) thresholds are released.			NA	na
	SNP number in QC'd dataset	324602		507459 genotyped /	534726	390785	Affymetrix: 667,371: Illumina: 870,197		1.7 to 1.8 million variants	881666		557192		805,426 genotyped. 92,693,895 autosomal imputed.
Imputation	Imputation Software	MaCH (version 1.0.16)	Michigan Imputation Server	IMPUTE2	Michigan Imputation Server	SHAPEIT2/Minimac3	SHAPEIT2, IMPUTE2	Michigan Imputation Server	Michigan Imputation Server	IMPUTE2	Michigan Imputation Server	IMPUTE	MaCH/minimac	IMPUTE2
	Imputation quality metrics	Rsq	Rsq	INFO			INFO	Rsq	NA	INFO	INFO		INFO
	Reference panel	1000 Genomes Phase 1 v3	HRC	1000 Genome Phase1 V3	HRC	HRC	1000 Genomes Phase 1 v3	HRC	HRC, SHAPEIT	1000 Genome Phase1 V3	HRC	1000 Genomes Phase 1 v3	1000 Genomes phase I version 3	1000 Genomes Phase 3, HRC
	Other SNP QC filters applied?	r2<0.6	No (not on the imputed data that I know of)		pre-imputation filtered out SNPs with call rate < 98%		No	r2<0.3	NA	NA	no	NA	none
Other	Software For Analysis	R v3.5.1	Rv3.6.1	R v3.5.2	R 3.5.1	R v3.5.1	R v3.5.1	R 3.5.2	R v3.5.1	SAS 9.4	R v3.5.1; Python 3	SPSS v21	R v3.5.1; SPSS

## Sheet: Table S2
Table S2: Cluster-specific Partitioned Polygenic Scores: SNP Lists and Weights
Beta Cell Cluster					Proinsulin Cluster					Obesity Cluster					Lipodystrophy Cluster					Liver/Lipid Cluster
SNP	Locus	Allele	weight		SNP	Locus	Allele	weight		SNP	Locus	Allele	weight		SNP	Locus	Allele	weight		SNP	Locus	Allele	weight
rs10830961	MTNR1B	G	3.80581		rs1552224	ARAP1	A	4.48401		rs11075990	FTO	G	4.96274		rs2943641	IRS1	C	3.00777		rs780094	GCKR	C	5.33953
rs7756992	CDKAL1	G	3.04885		rs1359790	SPRY2	G	1.07329		rs12970134	MC4R	A	2.7831		rs13389219	GRB14	C	2.73799		rs16996148	CILP2	T	2.05409
rs4502156	C2CD4A	T	2.68245		rs10276674	DGKB	C	1.00069		rs10146997	NRXN3	G	1.71518		rs2881654	PPARG	G	2.10695		rs9271775	HLA-DQA1	T	0.975506
rs1111875	HHEX	C	2.65615		rs4402960	IGF2BP2	T	0.969493		rs3736505	HSD17B12	G	1.23976		rs2820443	LYPLAL1	T	1.91856		rs738408	PNPLA3	T	0.841476
rs7903146	TCF7L2	T	2.46773		rs11063069	CCND2	G	0.812263		rs6742799	RBMS1	A	1.03627		rs459193	ANKRD55	G	1.79895		rs7961581	TSPAN8/LGR5	C	0.832409
rs3802177	SLC30A8	G	2.40699		rs4812829	HNF4A	A	0.793323							rs2925979	CMIP	T	1.74354
rs10811661	CDKN2A_B	T	1.76598		rs11257655	CDC123/CAMK1D	T	0.780257							rs3996352	KLF14	A	1.62802
rs11257655	CDC123/CAMK1D	T	1.58695												rs10503669	LPL	C	1.53634
rs7965349	OASL	C	1.55517												rs3843467	ANKRD55	T	1.30897
rs1371135	AP3S2	T	1.54231												rs702634	ARL15	A	1.28622
rs17265513	ZHX3	C	1.36929												rs11708067	ADCY5	A	1.24242
rs1496653	UBE2E2	A	1.34983												rs9891146	C17orf58	T	1.07818
rs1996546	ACSL1	G	1.34882												rs3132524	POU5F1	C	1.05609
rs12899811	PRC1	G	1.26205												rs2296172	MACF1	G	1.0313
rs8108269	GIPR	G	1.25476												rs4457053	ZBED3	G	0.964187
rs17676067	GLP2R	C	1.2156												rs2276853	KIF9	A	0.955534
rs5215	KCNJ11	C	1.19072												rs6795735	ADAMTS9	C	0.949143
rs233449	KCNQ1	G	1.18444												rs11063069	CCND2	G	0.938118
rs505922	ABO	C	1.16922												rs17106184	FAF1	G	0.812159
rs516946	ANK1	C	1.12099												rs1106240	MPHOSPH9	T	0.786263
rs10758593	GLIS3	A	1.09357
rs4430796	HNF1B	G	1.03812
rs9921586	CTRB2	G	1.00537
rs2184061	CDKN2A	A	0.971469
rs2334499	DUSP8	T	0.958817
rs11708067	ADCY5	A	0.91934
rs15563	GIP	G	0.88323
rs4812829	HNF4A	A	0.84393
rs3736505	HSD17B12	G	0.780543
rs17791513	TLE4	A	0.77635

## Sheet: Table S3
	Table S3: Cohort Specific Median partitioned Polygenic Score (pPS) by Cluster
Study	Betacell	Proinsulin	Obesity	Lipodystrophy	Liver/Lipid
AGES	44.1371	11.6449	8.75169	33.1895	8.96193
ARIC	45.2122	11.7922	8.48172	34.6089	8.72094
BioMe	46.1091	11.9268	8.75045	35.0765	8.13202
Doetinchem	47.4684	11.6469	8.275	34.1943	8.9739
FHS	45.424	11.8222	8.28516	34.8465	8.12352
GENOA	45.0597	11.622	8.76	34.571	9.03542
Health ABC	45.53	11.88	8.76	34.72	8.96
MGB	45.4982	11.84	8.3	34.822	8.14
MESA	45.7187	11.8774	8.4785	34.6902	8.1352
NEO	44.7014	11.6484	8.76	33.145	8.97168
PROSPER	42.19	11.65	8.28	31.67	10.73
Rotterdam	44.852	11.6091	8.32464	32.9057	8.75711
UKBB	45	11.79	8.28	34.67	8.97

## Sheet: Table S4
Table S4: pPS validation for BMI and Lipid Traits
		Meta-Analysis (T2D Cases Only)				Meta-Analysis (All Inidividuals with T2D Adustment)				UKBB Only (All Inidividuals with T2D Adustment)
Outcome	Cluster	Estimate	SE	pvalue		Estimate	SE	pvalue		Estimate	SE	pvalue	partial r2
Body Mass Index (BMI)	Betacell	-0.0901811	0.0086755	2.61497e-25		-0.0266165	0.00195023	2.07837e-42		-0.026659	0.00211447	1.94842e-36	0.000464025
Body Mass Index (BMI)	Proinsulin	-0.073266	0.024652	0.00295862		-0.0067702	0.000957054	1.47978e-12		-0.0061307	0.00103499	3.15619e-09	0.000102463
Body Mass Index (BMI)	Obesity	0.0373748	0.00325994	1.98053e-30		0.0269209	0.000734523	6.21291e-294		0.0260401	0.000792685	2.77364e-236	0.00314121
Body Mass Index (BMI)	Lipodystrophy	-0.0574175	0.00772114	1.03472e-13		-0.0228314	0.00168436	7.56289e-42		-0.0217626	0.00182618	9.80452e-33	0.000414585
Body Mass Index (BMI)	Liver/Lipid	-0.00522602	0.00301787	0.0833283		-0.000308884	0.000665883	0.64274		9.77988e-05	0.000719309	0.891851	5.3989e-08
HDL Cholesterol	Betacell	2.62057	0.593989	1.02508e-05		0.679578	0.170908	7.00012e-05		0.68596	0.191382	0.00033812	3.63591e-05
HDL Cholesterol	Proinsulin	2.6941	1.62072	0.0964552		0.280271	0.0833391	0.000767818		0.239817	0.0936352	0.010432	1.85657e-05
HDL Cholesterol	Obesity	-0.955146	0.216146	9.91663e-06		-0.540479	0.0640224	3.17577e-17		-0.520931	0.0718718	4.23858e-13	0.000148662
HDL Cholesterol	Lipodystrophy	-5.07493	0.518619	1.29997e-22		-5.13862	0.146979	9.94573e-268		-5.34806	0.16491	2.73805e-230	0.00296569
HDL Cholesterol	Liver/Lipid	0.500845	0.201465	0.0129182		0.297261	0.057924	2.86801e-07		0.232613	0.0650681	0.000350404	3.61701e-05
Log Triglycerides	Betacell	-0.0802665	0.026473	0.00242929		0.0157927	0.00622367	0.011164		0.0209297	0.00677675	0.00201212	2.87723e-05
Log Triglycerides	Proinsulin	-0.0593518	0.0742657	0.424185		-0.00111234	0.00304273	0.714592		0.000232142	0.00331768	0.944216	1.47688e-08
Log Triglycerides	Obesity	0.00593867	0.0098718	0.547454		0.0110271	0.00231272	1.87144e-06		0.00803602	0.00254512	0.00159188	3.00714e-05
Log Triglycerides	Lipodystrophy	0.250701	0.0231956	3.14966e-27		0.222833	0.00532245	p<1x10-300		0.226096	0.00583788	p<1x10-300	0.00450265
Log Triglycerides	Liver/Lipid	-0.111243	0.00908459	1.78237e-34		-0.09226	0.00208227	p<1x10-300		-0.0994133	0.00229818	p<1x10-300	0.00561042
Type 2 Diabetes	Betacell	-	-	-		-	-	-		2.37883	0.0632404	p<1x10-300	0.0142379
Type 2 Diabetes	Proinsulin	-	-	-		-	-	-		0.463364	0.0323713	1.78761e-46	0.00212068
Type 2 Diabetes	Obesity	-	-	-		-	-	-		0.278701	0.0234675	1.5768e-32	0.00140532
Type 2 Diabetes	Lipodystrophy	-	-	-		-	-	-		1.21741	0.0550973	3.47952e-108	0.004934
Type 2 Diabetes	Liver/Lipid	-	-	-		-	-	-		0.223152	0.0216776	7.4905e-25	0.00107024

## Sheet: Table S5
Tablse S5: pPS Results related to renal function in the UKBB
		Liver/Lipid, All individuals, no T2D adjustment					Liver/Lipid, All individuals adjusted for T2D					Liver/Lipid, just T2D cases
Outcome	UKBB-Field	N	Estimate	SE	P-Value		N	Estimate	SE	P-Value		N	Estimate	SE	P-Value
serum creatinine	30700	361278	0.921669	0.0528409	4.1991e-68		308192	0.852358	0.0561997	6.14551e-52		15068	0.73506	0.383832	0.0555039
serum cystatin C	30720	361435	0.00566565	0.000607668	1.13061e-20		308322	0.00439383	0.000633956	4.19244e-12		15085	-0.00313712	0.00449697	0.485434
eGFR cystatin C	calculated	360626	-0.608007	0.0591646	9.06069e-25		307688	-0.496239	0.0627301	2.56792e-15		14930	0.153383	0.370091	0.678553
Urine albumin creatinine ratio	calculated	366886	-0.0170039	0.00308535	3.5666e-08		313173	-0.0174562	0.00328699	1.09276e-07		15054	-0.0827472	0.0215413	0.000122875
serum albumin	30600	331929	-0.0229407	0.00114797	8.60353e-89		282991	-0.0210948	0.00123916	5.92223e-65		13891	-0.0181459	0.00621041	0.00348523
eGFR Slope	calculated	13062	-1.15773e-05	0.000420459	0.978034		10709	-0.000565604	0.000460739	0.219623		640	-0.000590321	0.00201473	0.769616

## Sheet: Table S6
Table S6: pPS Results, All Individuals, T2D Adjusted
		Meta-Analysis					UKBB Only
Outcome	Cluster	Estimate	SE	P-Value	I2		Estimate	SE	P-Value	partial r2
Coronary Artery Disease (CAD)	Betacell	0.112325	0.0635495	0.0771733	0.239407		0.0994582	0.0808491	0.218633	2.20916e-05
Coronary Artery Disease (CAD)	Proinsulin	-0.0316934	0.0313807	0.312512	0		0.00664837	0.0396364	0.866793	4.10953e-07
Coronary Artery Disease (CAD)	Obesity	0.0156126	0.0238501	0.512716	0.229998		-0.040609	0.0303289	0.180586	2.62028e-05
Coronary Artery Disease (CAD)	Lipodystrophy	0.104657	0.0551133	0.0575732	0.390163		0.121735	0.0699519	0.0818115	4.42442e-05
Coronary Artery Disease (CAD)	Liver/Lipid	-0.0828669	0.0215093	0.000117422	0.0454617		-0.0829605	0.0273388	0.00240903	0.000134138
estimated Glomerular Filtration Rate (eGFR)	Betacell	0.364351	0.145351	0.0121958	0.00897817		0.489313	0.145591	0.00077703	2.1023e-05
estimated Glomerular Filtration Rate (eGFR)	Proinsulin	-0.0838623	0.0712029	0.238879	0		-0.0661942	0.0715555	0.354928	3.98715e-06
estimated Glomerular Filtration Rate (eGFR)	Obesity	-0.0167855	0.0546167	0.758591	0.597431		-0.00873312	0.0548199	0.873428	1.08841e-07
estimated Glomerular Filtration Rate (eGFR)	Lipodystrophy	0.227199	0.125646	0.070569	0.531723		0.349652	0.126016	0.00552614	1.72615e-05
estimated Glomerular Filtration Rate (eGFR)	Liver/Lipid	-0.813482	0.0494581	9.42e-61	0.247917		-0.911536	0.0496441	2.89535e-75	0.000648481
Chronic Kidney Disease (CKD)	Betacell	-0.0142918	0.0705895	0.839571	0.269418		0.161284	0.0884943	0.0683735	1.79794e-06
Chronic Kidney Disease (CKD)	Proinsulin	0.0149819	0.0350716	0.669247	0		0.0190007	0.0436	0.662984	2.14105e-06
Chronic Kidney Disease (CKD)	Obesity	0.0480396	0.0263835	0.0686345	0.670818		0.0489689	0.0332272	0.140546	1.60035e-05
Chronic Kidney Disease (CKD)	Lipodystrophy	0.0878004	0.0609713	0.14986	0		0.142657	0.0765268	0.0623012	2.01128e-05
Chronic Kidney Disease (CKD)	Liver/Lipid	0.0553426	0.0239571	0.0209224	0.0620068		0.1531	0.030402	4.75708e-07	0.000263826
Systolic Blood Pressure (SBP)	Betacell	0.348534	0.228231	0.126774	0.0494356		0.433499	0.253137	0.0868036	7.55723e-06
Systolic Blood Pressure (SBP)	Proinsulin	-0.338916	0.111849	0.00244443	0.135766		-0.321375	0.123892	0.00948724	1.73392e-05
Systolic Blood Pressure (SBP)	Obesity	0.556683	0.0856151	7.92e-11	0		0.545754	0.0950224	9.28643e-09	8.49958e-05
Systolic Blood Pressure (SBP)	Lipodystrophy	1.80904	0.197257	4.69e-20	0.236055		2.02544	0.218605	1.95683e-20	0.000221158
Systolic Blood Pressure (SBP)	Liver/Lipid	-0.187954	0.0775022	0.0153332	0		-0.191317	0.0860854	0.026256	1.27275e-05
Diastolic Blood Pressure (DBP)	Betacell	-0.607638	0.137037	9.27e-06	0.381322		-0.526377	0.147782	0.0003683	3.71526e-05
Diastolic Blood Pressure (DBP)	Proinsulin	-0.251536	0.0672157	0.000182403	0.118564		-0.224509	0.0723293	0.00190948	2.82151e-05
Diastolic Blood Pressure (DBP)	Obesity	0.379828	0.051433	1.53e-13	0.21313		0.388978	0.0554739	2.35542e-12	0.000143966
Diastolic Blood Pressure (DBP)	Lipodystrophy	0.730425	0.118412	6.89e-10	0.318269		0.778485	0.127633	1.06599e-09	0.000108937
Diastolic Blood Pressure (DBP)	Liver/Lipid	-0.0291154	0.0465734	0.531996	0		-0.0293064	0.0502582	0.559815	9.95786e-07
Hypertension (HTN)	Betacell	-0.00460582	0.0264544	0.861798	0.256085		0.0087396	0.0288711	0.76211	3.98503e-07
Hypertension (HTN)	Proinsulin	-0.0287012	0.0129875	0.027112	0.169235		-0.0291042	0.0141237	0.0393344	1.84673e-05
Hypertension (HTN)	Obesity	0.0672912	0.00993343	1.25e-11	0		0.0663068	0.0108432	9.65034e-10	0.000162639
Hypertension (HTN)	Lipodystrophy	0.17818	0.0228807	6.84e-15	0.451988		0.19225	0.0249342	1.25516e-14	0.000258587
Hypertension (HTN)	Liver/Lipid	-0.0246004	0.00899291	0.0062434	0.246291		-0.0218077	0.00981778	0.0263343	2.14574e-05
bold = significant at Bonferroni level of significant in the meta-analysis(see Methods)

## Sheet: Table S7
Table S7: pPS Results, All Individuals, T2D Un-adjusted
		Meta-Analysis					UKBB Only
Outcome	Cluster	Estimate	SE	P-Value	I2		Estimate	SE	P-Value	partial r2
Coronary Artery Disease (CAD)	Betacell	0.340257	0.0564957	1.72e-09	0.257805		0.326197	0.0681836	1.7176e-06	0.000249311
Coronary Artery Disease (CAD)	Proinsulin	0.0129019	0.0280183	0.64517	0		0.045319	0.0336193	0.177656	1.98615e-05
Coronary Artery Disease (CAD)	Obesity	0.0510166	0.0212643	0.0164324	0.21716		0.00545744	0.02565	0.83151	4.93222e-07
Coronary Artery Disease (CAD)	Lipodystrophy	0.27757	0.0490693	1.54e-08	0.558758		0.313379	0.0590878	1.13528e-07	0.000307034
Coronary Artery Disease (CAD)	Liver/Lipid	-0.0575921	0.0191996	0.00271089	0		-0.0572088	0.0231711	0.0135501	6.63169e-05
estimated Glomerular Filtration Rate (eGFR)	Betacell	0.37153	0.136426	0.0064687	0.158012		0.496775	0.147515	0.000758268	2.44457e-05
estimated Glomerular Filtration Rate (eGFR)	Proinsulin	-0.0641958	0.0670772	0.338546	0		-0.0520224	0.0724986	0.473026	1.10992e-06
estimated Glomerular Filtration Rate (eGFR)	Obesity	-0.0381502	0.0513929	0.457891	0.589469		-0.0273175	0.055546	0.622861	5.21368e-07
estimated Glomerular Filtration Rate (eGFR)	Lipodystrophy	0.211883	0.118202	0.0730438	0.619066		0.333516	0.127692	0.00900498	1.4705e-05
estimated Glomerular Filtration Rate (eGFR)	Liver/Lipid	-0.870738	0.0465518	5.03e-78	0.240008		-0.89642	0.0503016	5.21636e-71	0.000683986
Chronic Kidney Disease (CKD)	Betacell	0.171625	0.0653298	0.00861981	0.240402		0.141598	0.0859054	0.0992912	4.12778e-05
Chronic Kidney Disease (CKD)	Proinsulin	0.0304797	0.0325409	0.348935	0		0.00589882	0.0422606	0.88899	2.96194e-07
Chronic Kidney Disease (CKD)	Obesity	0.0668135	0.0245109	0.00641312	0.658816		0.0584554	0.0322468	0.0698702	4.98615e-05
Chronic Kidney Disease (CKD)	Lipodystrophy	0.171953	0.0565529	0.00236139	0		0.14563	0.0743005	0.0499941	5.84229e-05
Chronic Kidney Disease (CKD)	Liver/Lipid	0.0845803	0.0222872	0.000148309	0.283467		0.13488	0.029481	4.75862e-06	0.000319653
Systolic Blood Pressure (SBP)	Betacell	1.42762	0.215604	3.57e-11	0.0332004		1.53045	0.236226	9.25947e-11	9.33872e-05
Systolic Blood Pressure (SBP)	Proinsulin	-0.152144	0.106064	0.151444	0.160396		-0.123207	0.116086	0.288538	2.50643e-06
Systolic Blood Pressure (SBP)	Obesity	0.67569	0.0811098	8.05e-17	0		0.660964	0.0889231	1.06402e-13	0.000122918
Systolic Blood Pressure (SBP)	Lipodystrophy	2.43277	0.186784	8.88e-39	0.344002		2.65279	0.204498	1.79241e-38	0.000374272
Systolic Blood Pressure (SBP)	Liver/Lipid	-0.0855135	0.07346	0.244532	0		-0.0844627	0.0805871	0.294597	2.44427e-06
Diastolic Blood Pressure (DBP)	Betacell	-0.130855	0.12831	0.307857	0.539943		-0.0218709	0.137047	0.873207	6.39867e-08
Diastolic Blood Pressure (DBP)	Proinsulin	-0.180106	0.0631673	0.0043548	0.124828		-0.151038	0.0673439	0.0249108	1.26377e-05
Diastolic Blood Pressure (DBP)	Obesity	0.4355	0.0482912	1.91e-19	0.384733		0.447268	0.051585	4.31862e-18	0.000188842
Diastolic Blood Pressure (DBP)	Lipodystrophy	0.945611	0.11113	1.75e-17	0.429181		1.00784	0.118649	1.99878e-17	0.000181245
Diastolic Blood Pressure (DBP)	Liver/Lipid	0.0429546	0.0437467	0.326298	0		0.049872	0.0467505	0.286076	2.85916e-06
Hypertension (HTN)	Betacell	0.136497	0.0245114	2.58e-08	0.475078		0.158996	0.0264462	1.8319e-09	0.000133518
Hypertension (HTN)	Proinsulin	-0.00516969	0.0120832	0.668766	0.0608639		-0.00252572	0.0129976	0.845924	1.39476e-07
Hypertension (HTN)	Obesity	0.0814536	0.00922896	1.09e-18	0.0767525		0.0811251	0.00995955	3.77862e-16	0.000245128
Hypertension (HTN)	Lipodystrophy	0.260848	0.021259	1.31e-34	0.679887		0.281892	0.0229107	8.62344e-35	0.000559358
Hypertension (HTN)	Liver/Lipid	-0.0119501	0.00835869	0.152937	0.192769		-0.00902929	0.00902166	0.316901	3.69994e-06
bold = significant at Bonferroni level of significant (see Methods)

## Sheet: Table S8
Tablse S8: pPS Results, T2D Cases Only
		Meta-Analysis					UKBB Only
Outcome	Cluster	Estimate	SE	P-Value	I2		Estimate	SE	P-Value	partial r2
Coronary Artery Disease (CAD)	Betacell	0.21018	0.141472	0.137409	0.234337		0.228521	0.18863	0.225714	0.000182982
Coronary Artery Disease (CAD)	Proinsulin	-0.0266723	0.0722778	0.71211	0.0667703		0.081153	0.0956396	0.396143	9.01852e-05
Coronary Artery Disease (CAD)	Obesity	0.033119	0.0530113	0.532133	0		-0.0240098	0.0703735	0.73297	1.45222e-05
Coronary Artery Disease (CAD)	Lipodystrophy	0.228763	0.124698	0.0665742	0		0.272095	0.167047	0.103344	0.000331299
Coronary Artery Disease (CAD)	Liver/Lipid	-0.165777	0.0484365	0.00062268	0.231299		-0.184972	0.0641142	0.0039136	0.00103328
estimated Glomerular Filtration Rate (eGFR)	Betacell	-0.480306	0.751896	0.523002	0.00287371		-0.995741	0.882498	0.259203	6.78284e-05
estimated Glomerular Filtration Rate (eGFR)	Proinsulin	0.178165	0.379127	0.638402	0		0.240328	0.443901	0.58824	1.56174e-05
estimated Glomerular Filtration Rate (eGFR)	Obesity	-0.468268	0.279519	0.0938828	0.103141		-0.499844	0.32792	0.127458	0.00012378
estimated Glomerular Filtration Rate (eGFR)	Lipodystrophy	-0.451276	0.663567	0.496457	0		-0.0145304	0.777908	0.985098	1.859e-08
estimated Glomerular Filtration Rate (eGFR)	Liver/Lipid	-0.502574	0.258154	0.0516289	0.366172		-0.700915	0.30335	0.0208696	0.000284361
Chronic Kidney Disease (CKD)	Betacell	-0.244816	0.162421	0.131777	0		-0.218923	0.261842	0.403106	0.000131009
Chronic Kidney Disease (CKD)	Proinsulin	-0.00898139	0.0832759	0.914114	0		-0.141806	0.131017	0.279098	0.000217565
Chronic Kidney Disease (CKD)	Obesity	0.0725128	0.0606224	0.231643	0		0.130189	0.0971052	0.180017	0.000335937
Chronic Kidney Disease (CKD)	Lipodystrophy	0.175247	0.142621	0.219162	0		0.19793	0.232118	0.39382	0.000136353
Chronic Kidney Disease (CKD)	Liver/Lipid	-0.0159182	0.0556831	0.775042	0		0.0588666	0.0901285	0.513666	8.00884e-05
Systolic Blood Pressure (SBP)	Betacell	0.458954	0.915914	0.616347	0.557613		1.65419	1.13407	0.144689	0.000127172
Systolic Blood Pressure (SBP)	Proinsulin	-0.169566	0.464205	0.714901	0.00256776		-0.442417	0.570526	0.438083	3.5947e-05
Systolic Blood Pressure (SBP)	Obesity	-0.132214	0.340772	0.698028	0		0.198414	0.420867	0.637332	1.32867e-05
Systolic Blood Pressure (SBP)	Lipodystrophy	1.8761	0.80503	0.0197813	0.178187		2.14333	0.999227	0.0319688	0.000274973
Systolic Blood Pressure (SBP)	Liver/Lipid	0.300745	0.315853	0.341156	0.498564		0.0460877	0.389799	0.905883	8.35708e-07
Diastolic Blood Pressure (DBP)	Betacell	-0.587186	0.543693	0.280196	0.319288		-0.0582315	0.653477	0.928995	4.9661e-07
Diastolic Blood Pressure (DBP)	Proinsulin	-0.17295	0.275304	0.529864	0		-0.519961	0.328707	0.113707	0.000156464
Diastolic Blood Pressure (DBP)	Obesity	0.0400114	0.201901	0.84291	0		0.23168	0.24249	0.339381	5.7085e-05
Diastolic Blood Pressure (DBP)	Lipodystrophy	-0.305409	0.477766	0.522664	0		-0.201016	0.575818	0.727022	7.62163e-06
Diastolic Blood Pressure (DBP)	Liver/Lipid	0.345884	0.187016	0.064468	0.407067		0.0389238	0.224595	0.862413	1.8784e-06
Hypertension (HTN)	Betacell	0.0203123	0.120984	0.866682	0.251112		0.170087	0.161936	0.293566	0.000117786
Hypertension (HTN)	Proinsulin	-0.0276915	0.0618828	0.654527	0		-0.0368987	0.0814462	0.650517	2.1944e-05
Hypertension (HTN)	Obesity	0.0564593	0.0449049	0.208642	0		0.118528	0.0601323	0.0487105	0.000415582
Hypertension (HTN)	Lipodystrophy	0.340678	0.106079	0.00132021	0.45544		0.324278	0.142188	0.0225708	0.00055472
Hypertension (HTN)	Liver/Lipid	-0.022366	0.0416466	0.591349	0.520068		-0.106405	0.0559778	0.0573217	0.000386797
Insulin Use	Betacell	-0.358324	0.119809	0.00278542	0.570241		-0.657901	0.148524	9.44058e-06	0.00193234
Insulin Use	Proinsulin	-0.138015	0.0603352	0.0221686	0		-0.180752	0.0736022	0.0140574	0.000588646
Insulin Use	Obesity	-0.0363163	0.0446246	0.415749	0.358237		-0.09728	0.0550348	0.0771264	0.000307534
Insulin Use	Lipodystrophy	-0.0734241	0.105358	0.485866	0.525626		-0.366555	0.130201	0.00487317	0.000778407
Insulin Use	Liver/Lipid	0.0682305	0.0412493	0.0982083	0		0.0984873	0.0511358	0.054105	0.000365454
Age of Type 2 Diabetes Diagnosis	Betacell	-0.908554	0.305157	0.00291071	0		-0.860922	0.34125	0.0116517	0.000227653
Age of Type 2 Diabetes Diagnosis	Proinsulin	-0.145007	0.154466	0.347852	0.368059		-0.223399	0.172226	0.194608	6.02006e-05
Age of Type 2 Diabetes Diagnosis	Obesity	-0.115253	0.113013	0.307813	0.111883		-0.14158	0.126729	0.263933	4.46582e-05
Age of Type 2 Diabetes Diagnosis	Lipodystrophy	0.165787	0.267001	0.534651	0		0.266195	0.300499	0.375715	2.80788e-05
Age of Type 2 Diabetes Diagnosis	Liver/Lipid	-0.0338565	0.103688	0.744103	0.570659		-0.0617552	0.116905	0.597334	9.98522e-06
bold = significant at Bonferroni level of significant (see Methods)

## Sheet: Table S9
Table S9: Extreme pPS Results, All Individuals, T2D Adjusted
Meta-Analysis (CHARGE + UKBB)	Betacell			Proinsulin			Obesity			Lipodystrophy			Liver/Lipid			Global Test
Outcome	Estimate	SE	P-Value	Estimate	SE	P-Value	Estimate	SE	P-Value	Estimate	SE	P-Value	Estimate	SE	P-Value	P-Value
Coronary Artery Disease (CAD)	-2.41286	1.62019	0.136423	-0.397162	0.316357	0.209325	0.432381	0.340942	0.204728	2.44983	0.974612	0.0119488	-0.538396	0.282175	0.0563885	0.00892017
estimated Glomerular Filtration Rate (eGFR)	5.50763	3.62509	0.128685	-0.373173	0.713353	0.600887	0.222797	0.773707	0.773377	1.94436	2.22209	0.381567	-5.82178	0.612719	2.06801e-21	1.13e-18
Chronic Kidney Disease (CKD)	-1.70571	1.78796	0.340085	0.197766	0.343455	0.564741	0.547842	0.370052	0.138754	-0.253227	1.10724	0.819102	0.4899	0.298243	0.100461	0.295567
Systolic Blood Pressure (SBP)	-5.40121	5.67374	0.341114	0.229799	1.10594	0.835396	5.45511	1.19699	5.17976e-06	16.9099	3.44635	9.26595e-07	-0.616833	0.955651	0.51863	8.06e-09
Diastolic Blood Pressure (DBP)	-14.5411	3.4312	2.25618e-05	-0.672515	0.666407	0.312895	4.18409	0.721064	6.52692e-09	7.9914	2.07613	0.000118516	-0.13017	0.573498	0.820443	3.83e-13
Hypertension (HTN)	-0.842636	0.66102	0.202397	-0.0445346	0.128626	0.729167	0.551971	0.139379	7.48851e-05	1.41707	0.401928	0.000422408	-0.132838	0.110757	0.230386	8.47e-06
bold = significant at Bonferroni level of significant (see Methods)
UKBB Only	Betacell			Proinsulin			Obesity			Lipodystrophy			Liver/Lipid			Global Test
Outcome	Estimate	SE	P-Value	Estimate	SE	P-Value	Estimate	SE	P-Value	Estimate	SE	P-Value	Estimate	SE	P-Value	P-Value
Coronary Artery Disease (CAD)	-2.10783	2.03063	0.299262	-0.159342	0.390372	0.683141	0.0289771	0.420466	0.945056	1.9795	1.17727	0.0926804	-0.321633	0.336742	0.339512	0.421034
estimated Glomerular Filtration Rate (eGFR)	6.11853	4.03168	0.129113	-0.166979	0.774771	0.829362	0.137422	0.836654	0.869533	2.90013	2.40278	0.227438	-5.79184	0.658367	1.40858e-18	4.70007e-16
Chronic Kidney Disease (CKD)	-1.74633	2.47859	0.48108	-0.146624	0.477243	0.758667	0.685479	0.50394	0.173755	-0.368581	1.48129	0.803496	1.10822	0.39014	0.00450327	0.0609326
Systolic Blood Pressure (SBP)	-1.62117	6.43499	0.801095	0.99698	1.23778	0.420557	5.82446	1.33578	1.29901e-05	16.0114	3.83693	3.00747e-05	-1.08889	1.05084	0.300102	3.08894e-07
Diastolic Blood Pressure (DBP)	-11.7472	3.75676	0.0017664	-0.226661	0.722619	0.753775	4.4938	0.779831	8.2939e-09	6.44074	2.24001	0.00403644	-0.209144	0.613481	0.733168	7.53256e-10
Hypertension (HTN)	-0.682309	0.738366	0.355445	-0.00819869	0.141568	0.953817	0.56835	0.152674	0.000197146	1.47643	0.439475	0.000780761	-0.191739	0.120023	0.110149	2.85958e-05

## Sheet: Table S10
Table S10: Extreme pPS Results, All Individuals, T2D Un-adjusted
Meta-Analysis (CHARGE + UKBB)	Betacell			Proinsulin			Obesity			Lipodystrophy			Liver/Lipid			Global Test
Outcome	Estimate	SE	P-Value	Estimate	SE	P-Value	Estimate	SE	P-Value	Estimate	SE	P-Value	Estimate	SE	P-Value	P-Value
Coronary Artery Disease (CAD)	1.51399	1.41536	0.284759	-0.185791	0.279986	0.506964	0.560635	0.302539	0.0638677	3.48676	0.851434	4.21872e-05	-0.325604	0.24826	0.189674	0.000272734
estimated Glomerular Filtration Rate (eGFR)	5.24516	3.36352	0.118896	-0.0709073	0.66794	0.915457	-0.00325332	0.727722	0.996433	1.66958	2.07339	0.42068	-5.88602	0.575207	1.4127e-24	1.2e-21
Chronic Kidney Disease (CKD)	1.05823	1.62824	0.51574	0.289463	0.317281	0.361598	0.671274	0.342232	0.0498252	0.832669	1.00978	0.409596	0.623961	0.273946	0.0227457	0.0499662
Systolic Blood Pressure (SBP)	11.0622	5.29114	0.0365544	0.779707	1.04171	0.454167	6.84663	1.13299	1.51306e-09	21.2732	3.23603	4.90213e-11	0.205413	0.902019	0.819859	6.04e-17
Diastolic Blood Pressure (DBP)	-6.82272	3.16618	0.031172	-0.530128	0.621691	0.393814	4.89042	0.676182	4.74506e-13	8.82953	1.93036	4.78424e-06	0.373677	0.536426	0.48605	1.43e-15
Hypertension (HTN)	0.985336	0.601021	0.101122	0.0870763	0.118562	0.462684	0.731443	0.129313	1.54585e-08	2.01662	0.369402	4.78449e-08	0.00739172	0.102397	0.942453	8.51e-13
bold = significant at Bonferroni level of significant (see Methods)
UKBB Only	Betacell			Proinsulin			Obesity			Lipodystrophy			Liver/Lipid			Global Test
Outcome	Estimate	SE	P-Value	Estimate	SE	P-Value	Estimate	SE	P-Value	Estimate	SE	P-Value	Estimate	SE	P-Value	P-Value
Coronary Artery Disease (CAD)	2.02094	1.68004	0.229011	0.00195783	0.330032	0.995267	0.207389	0.356593	0.560847	2.97593	0.985094	0.00251976	-0.147174	0.284473	0.604909	0.0470173
estimated Glomerular Filtration Rate (eGFR)	6.31065	3.67942	0.086324	0.191447	0.717199	0.789517	-0.0229752	0.779078	0.976474	2.8817	2.21689	0.193642	-5.8681	0.61229	9.40567e-22	2.86096e-19
Chronic Kidney Disease (CKD)	1.23758	2.11979	0.559339	-0.0422065	0.416972	0.919375	0.674619	0.442751	0.127584	0.378736	1.28101	0.767493	1.12138	0.341612	0.00102845	0.0187602
Systolic Blood Pressure (SBP)	15.2772	5.8893	0.00948519	1.47903	1.14882	0.197945	7.14803	1.24769	1.01088e-08	20.5421	3.55056	7.23106e-09	-0.162248	0.98022	0.868533	6.5872e-15
Diastolic Blood Pressure (DBP)	-3.59875	3.41656	0.292193	-0.126084	0.666466	0.84995	5.20608	0.723821	6.37358e-13	7.5709	2.05978	0.000237345	0.348815	0.568655	0.53961	4.77017e-13
Hypertension (HTN)	1.35245	0.659274	0.0402253	0.142484	0.128661	0.268106	0.759838	0.139941	5.64531e-08	2.13213	0.398655	8.87736e-08	-0.0331085	0.109755	0.762912	1.53007e-12

[truncated: 3 more sheets: Table S11, Table S12, Table S13]
